# Supplementary material
Source: publisher figshare collection journal article supplement (https://acs.figshare.com/ndownloader/files/4756558)
Supplement: Supplementary file 1 [file 4756558]

## Supporting Information

### Tuning of the Optical Properties and Lewis Acidity of Dibenzopnictogenaborins by Modification on Bridging Main Group Elements

Tomohiro Agou, Junji Kobayashi, and Takayuki Kawashima

Orbital plots (isovalue: 0.03)

All the calculations were carried out at B3LYP/6-31G(d) level of theory using Gaussian 03 program package. Orbital plots were generated by GaussView 3.09.<sup>1</sup> In order to reduce computation time, mesityl groups on boron atoms were replaced by phenyl groups.

LUMO of **1**

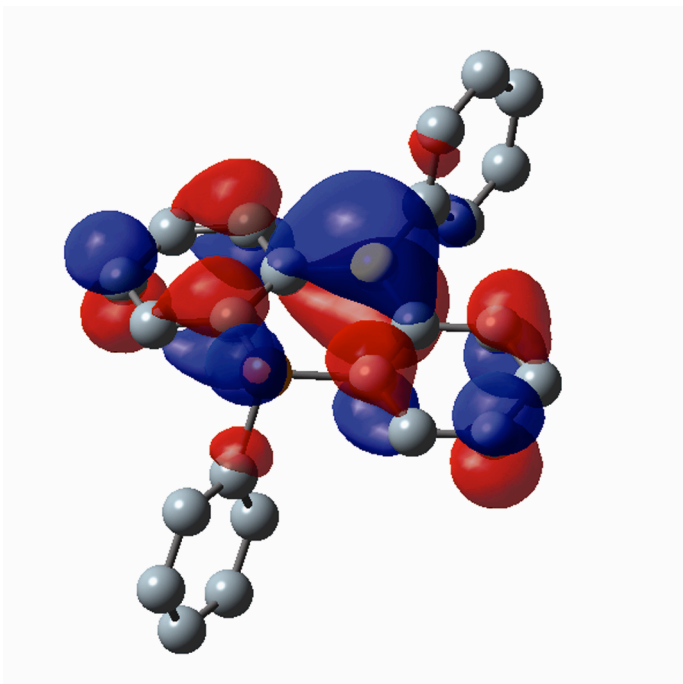

HOMO of 1

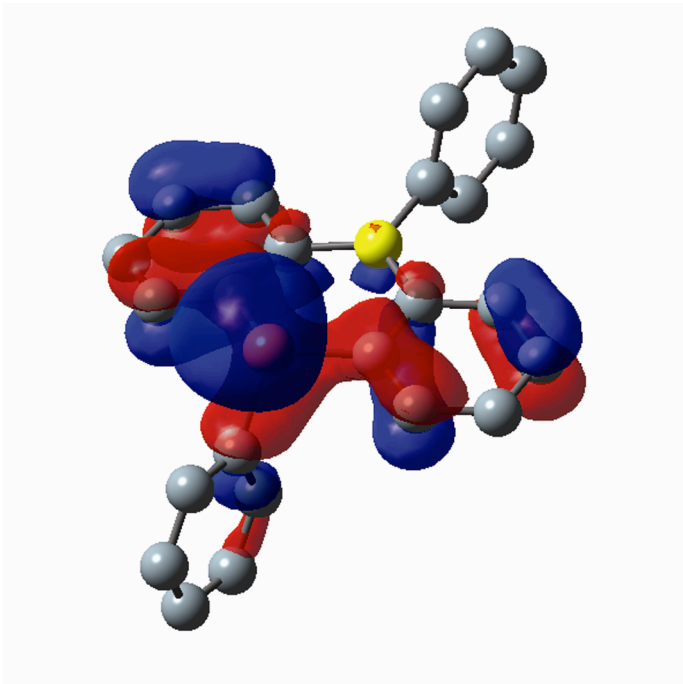

LUMO of 2

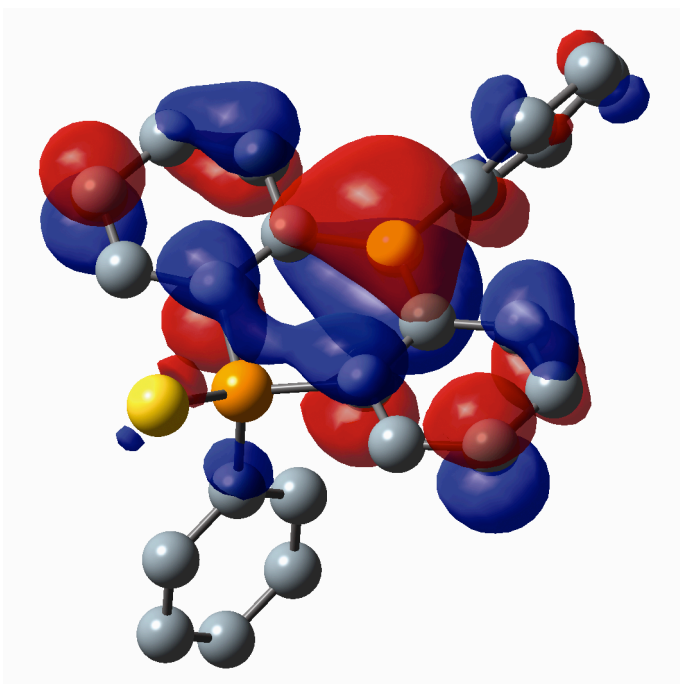

HOMO of 2

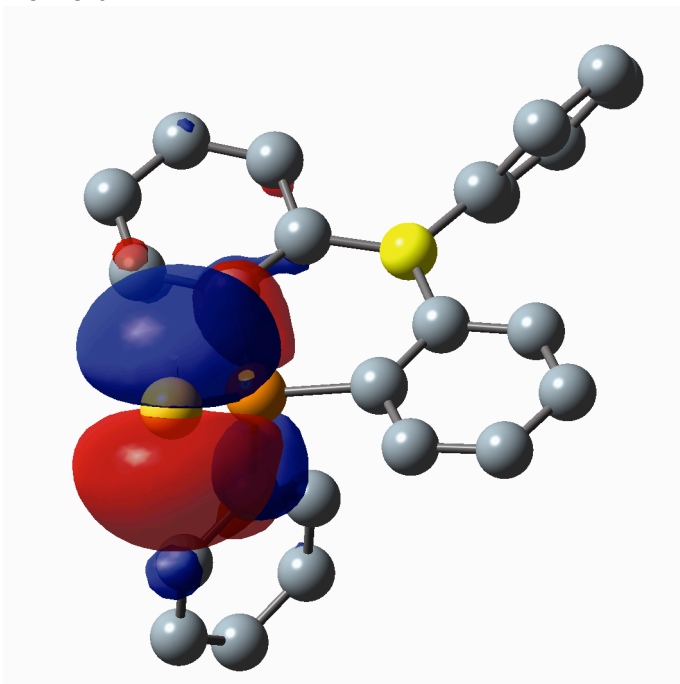

LUMO of 2

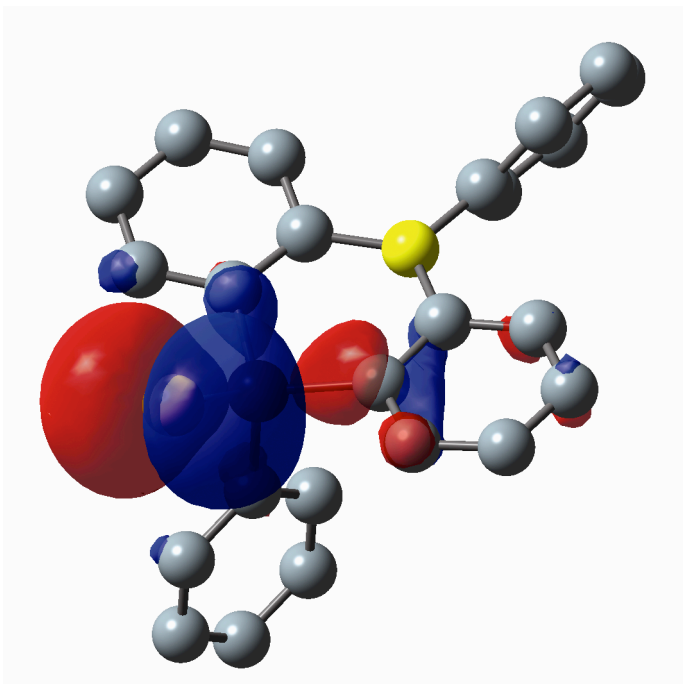

LUMO of **3**

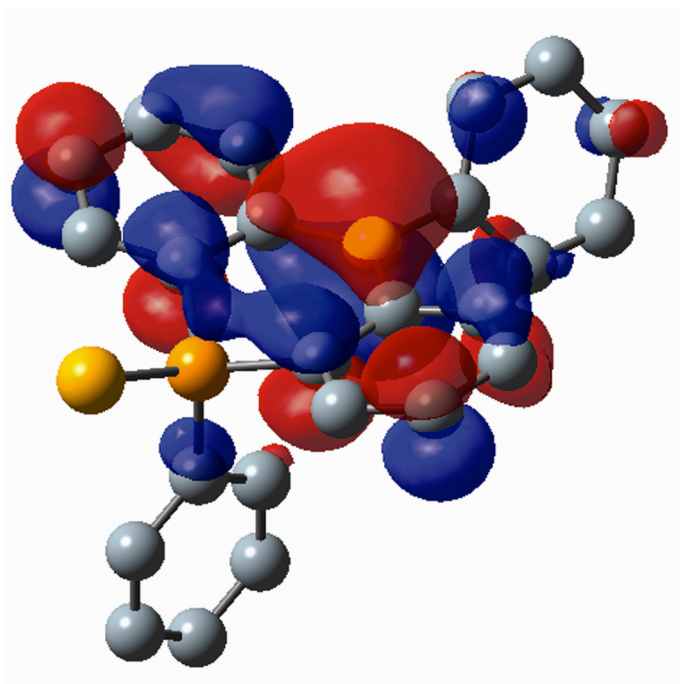

HOMO of **3**

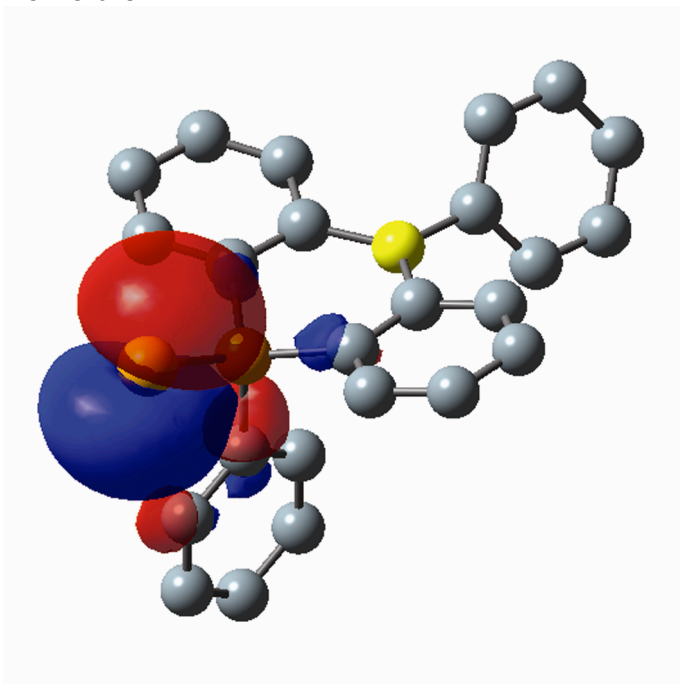

NHOMO of **3**

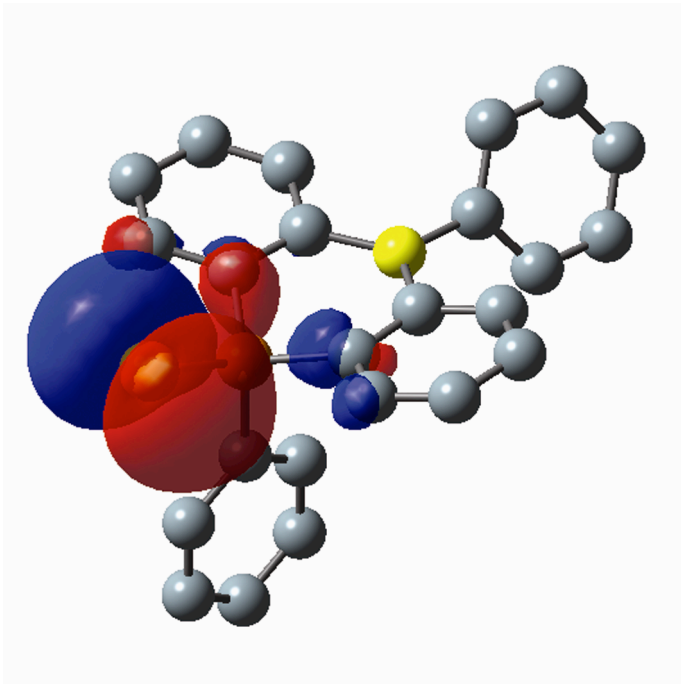

LUMO of 4

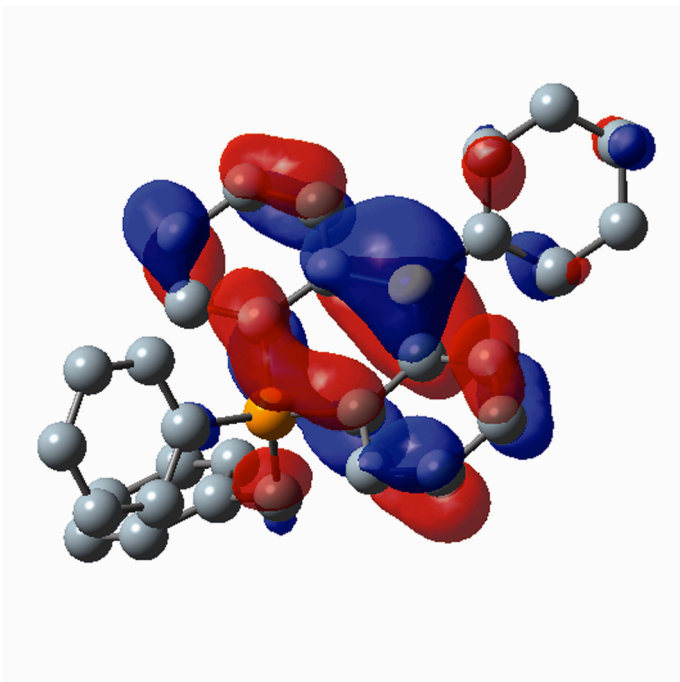

HOMO of **4** (a  $\pi$  orbital of the *B*-Ph group)

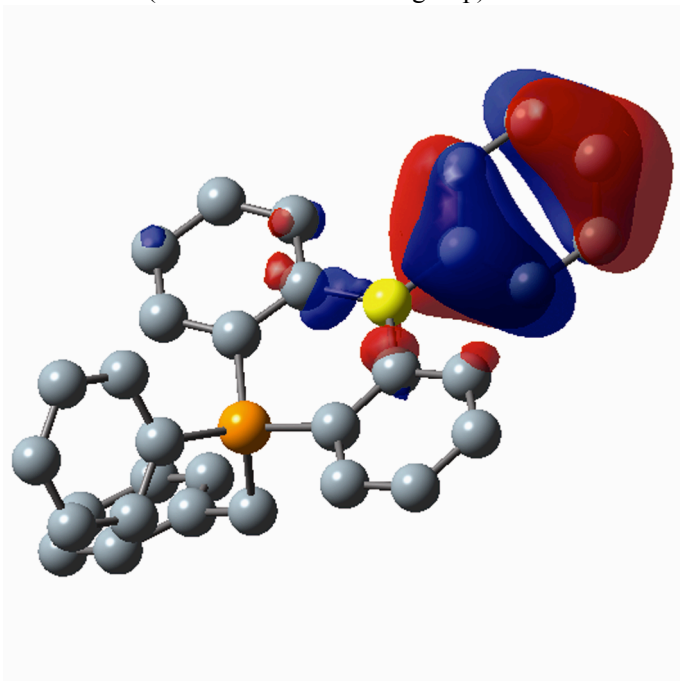

The highest  $\pi$  orbital of **4**

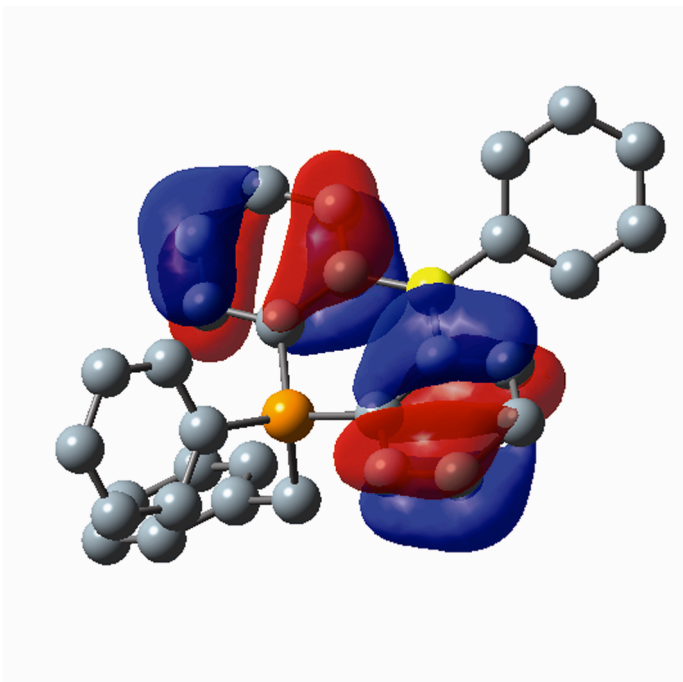

The second highest  $\pi$  orbital of 4

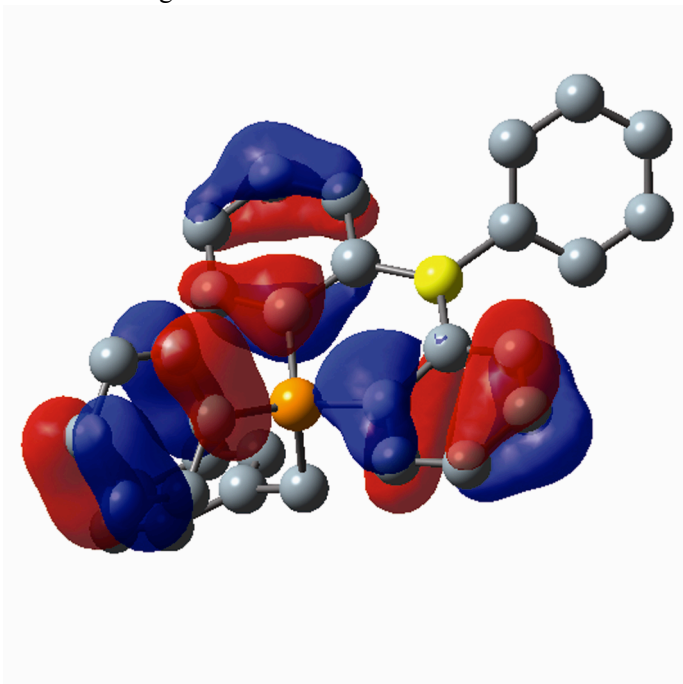

LUMO of 7



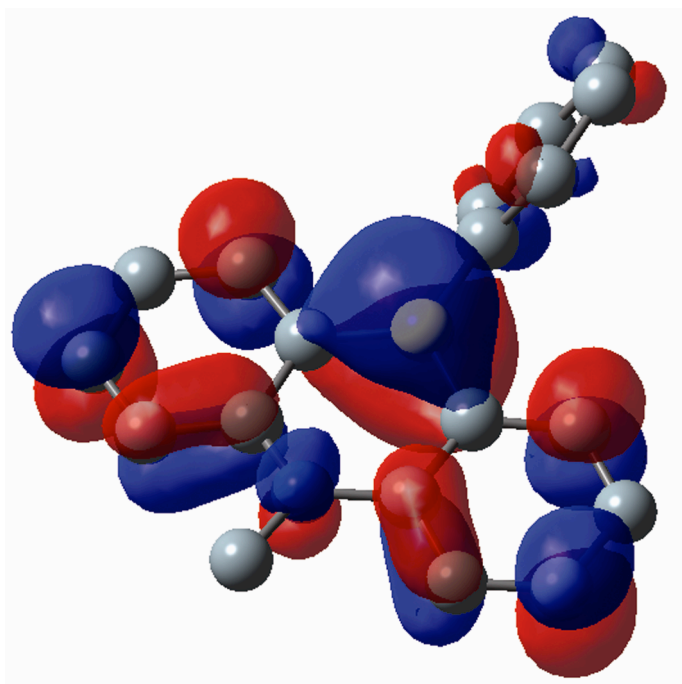

HOMO of 7

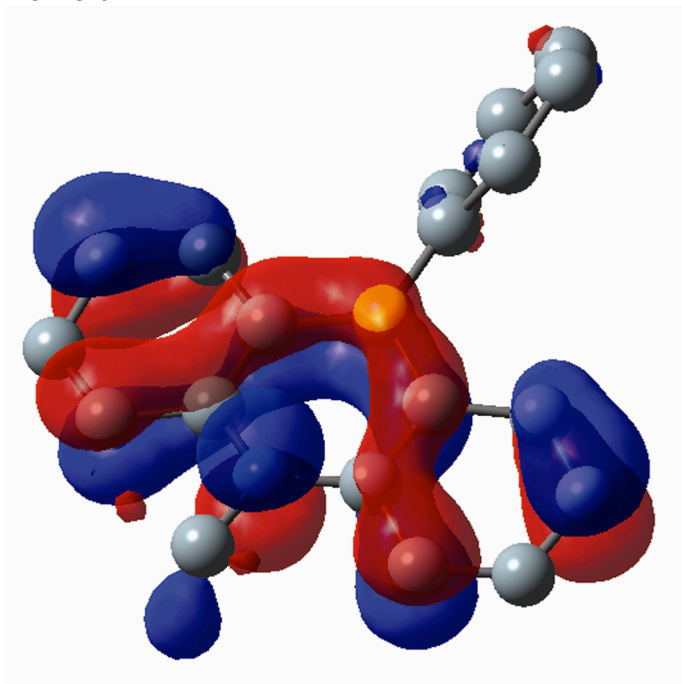

#### Reference for Supporting Information

(1) GaussView, Version 3.09, Dennington II, Roy; Keith, Todd; Millam, John; Eppinnett, Ken; Hovell, W. Lee; and Gilliland, Ray; Semichem, Inc., Shawnee Mission, KS, 2003.
